# Supplementary material for: Interleukin-13 receptor α2 is a novel marker and potential therapeutic target for human melanoma
Source: PubMed Central journal article supplement (PMC6362032; doi:10.1038/s41598-019-39018-3), 2019-02-04

## Supplementary Information

### **Interleukin-13 receptor $\alpha 2$ is a novel marker and potential therapeutic target for human melanoma**

Hayato Okamoto<sup>1</sup>, Yasuhiro Yoshimatsu<sup>1,2</sup>, Taishi Tomizawa<sup>1</sup>, Akiko Kunita<sup>3</sup>, Rina Takayama<sup>2</sup>, Teppei Morikawa<sup>3</sup>, Daisuke Komura<sup>4</sup>, Kazuki Takahashi<sup>2</sup>, Tsukasa Oshima<sup>5</sup>, Moegi Sato<sup>1</sup>, Mao Komai<sup>1</sup>, Katarzyna A. Podyma-Inoue<sup>2</sup>, Hiroaki Uchida<sup>1,6</sup>, Hirofumi Hamada<sup>1</sup>, Katsuhito Fujiu<sup>5,7</sup>, Shumpei Ishikawa<sup>4</sup>, Masashi Fukayama<sup>3</sup>, Takeshi Fukuhara<sup>1,8</sup> and Tetsuro Watabe<sup>1,2</sup>

<sup>1</sup>Laboratory of Oncology, School of Life Sciences, Tokyo University of Pharmacy and Life Sciences, Tokyo, Japan,

<sup>2</sup>Department of Biochemistry, Graduate School of Medical and Dental Sciences, Tokyo Medical and Dental University (TMDU), Tokyo, Japan,

<sup>3</sup>Department of Pathology, Graduate School of Medicine, The University of Tokyo, Tokyo, Japan,

<sup>4</sup>Department of Genomic Pathology, Medical Research Institute, Tokyo Medical and Dental University (TMDU), Tokyo, Japan,

<sup>5</sup>Department of Cardiovascular Medicine, Graduate School of Medicine, The University of Tokyo, Tokyo, Japan,

<sup>6</sup>Project Division of Cancer Biomolecular Therapy, The Institute of Medical Science, The University of Tokyo, Tokyo, Japan,

<sup>7</sup>Department of Advanced Cardiology, Graduate School of Medicine, The University of Tokyo, Tokyo, Japan,

<sup>8</sup>Department of Neurology, Juntendo University School of Medicine, Tokyo, Japan

## Materials and methods

### Gene expression analysis of publicly available data

RNA-sequencing data of *IL13RA2* from the Cancer Cell Line Encyclopedia (CCLE) project were downloaded from the Broad CCLE portal and 1444 cell lines were used for the analysis. RNA-sequencing data of the Cancer Genome Atlas (TCGA) for skin cutaneous melanoma (SKCM) were obtained from Firehose using the Bioconductor package RTCGAToolbox (version 2.8.0). A provisional dataset of 469 samples were used for the analysis. Spearman rank correlation was used to assess correlation between gene expression levels.

### Figure legends

**Figure S1. *In silico* analysis of *IL13RA2* expression.** Cancer Cell Line Encyclopedia (CCLE) was used to study the frequency of *IL13RA2* expression in various types of carcinoma cell lines.

**Figure S2. Immunohistochemical analysis for IL13R $\alpha$ 2 expression in A375, A375-IL13RA2 KO, or A2058 xenograft and normal human tissues.** (A) A375 xenograft (B) A375-IL13RA2 KO xenograft (C) A2058 xenograft, (D) testis, (E) stomach, (F) pancreas, (G) kidney, (H) lung. Scale bars: 50  $\mu$ m.

**Figure S3. Effect of IL-13 on the *in vitro* proliferation of various melanoma cells.** In all, (A)  $8 \times 10^4$  of SK-MEL-28, (B)  $8 \times 10^4$  of SK-IL13R $\alpha$ 2 and (C)  $1.8 \times 10^4$  of A375 cells, were seeded into 6-well plates and were grown in the presence or absence of IL-13. The cells were harvested after (A) 2, (B) 2 or (C) 3 days, respectively, and were counted. The number of cells at the indicated time period are expressed as mean  $\pm$  SD. \* $p < 0.05$ ; Student's t-test.

**Figure S4. Effect of IL13R $\alpha$ 2 expression on tumour angiogenesis.** Sections of tumours derived from the SK-MEL-28 ( $n = 6$ ) and SK-IL13R $\alpha$ 2 ( $n = 5$ ) cells were subjected to immunofluorescence staining with the anti-PECAM-1 antibody. Scale bar: 100  $\mu$ m.

**Figure S5. Correlation between *IL13RA2* and *AREG* mRNA expression levels in melanoma tissues.** A scatter plot revealing the correlation between the *IL13RA2* mRNA and *AREG* mRNA expressions.

**Figure S6. Effect of IL13R $\alpha$ 2 on VEGF expression in various melanoma cells. (A)** The SK-MEL-28 melanoma cells were transfected with the IL13R $\alpha$ 2 expression vector, followed by qRT-PCR analysis to determine the expression of IL13R $\alpha$ 2 (top) and VEGF (bottom). (B) *IL13RA2* was knocked out in the A375 melanoma cells, followed by qRT-PCR analysis for the expression of IL13R $\alpha$ 2 (top) and VEGF (bottom). All values are mean  $\pm$  SD. \* $p < 0.05$ ; Student's t-test.

**Figure S7. Full-length blots of cropped images shown in Figure 5A.**

**Supplementary Table 1. Summary of tissue microarray**

| <b>Slide name</b> | <b>Position</b> | <b>Ratio of IL13RA2+ cells (%)</b> | <b>Organ</b> | <b>Pathological diagnosis</b>             |
|-------------------|-----------------|------------------------------------|--------------|-------------------------------------------|
| ME1004e           | A10             | 10                                 | Skin         | Malignant melanoma of right sole          |
| ME1004e           | B2              | 15                                 | Skin         | Malignant melanoma of sole                |
| ME1004e           | C7              | 2                                  | Skin         | Malignant melanoma of heel                |
| ME1004e           | D8              | 90                                 | Skin         | Malignant melanoma of left thigh          |
| ME1004e           | D9              | 40                                 | Vulva        | Malignant melanoma of cunnus              |
| ME1004e           | H1              | 10                                 | Lymph node   | Metastatic malignant melanoma from armpit |
| ME1004e           | E1              | 3                                  | Skin         | Malignant melanoma                        |
| ME1004e           | E5              | 15                                 | Skin         | Malignant melanoma                        |
| ME1004e           | F8              | 5                                  | Skin         | Malignant melanoma                        |
| ME1004e           | G3              | 3                                  | Skin         | Malignant melanoma                        |
| ME1004e           | A7              | 1                                  | Skin         | Malignant melanoma                        |
| ME208             | D2              | 1                                  | Skin         | Malignant melanoma of left chest wall     |
| ME208             | D6              | 2                                  | Skin         | Malignant melanoma                        |
| ME208             | H4              | 1                                  | Lymph node   | Metastatic malignant melanoma from armpit |

**Supplementary Table 2. Primers for quantitative RT-PCR**

| Transcript                           | Primer | Sequence (5' to 3')       |
|--------------------------------------|--------|---------------------------|
| <i>GAPDH</i><br>(GAPDH)              | 5'     | GAAGGTGAAGGTCGGAGTC       |
|                                      | 3'     | GAAGATGGTGATGGGATTTC      |
| <i>ACTB</i><br>( $\beta$ -actin)     | 5'     | TCACCCACACTGTGCCCATCTACGA |
|                                      | 3'     | CAGCGGAACCGCTCATTGCCAATGG |
| <i>IL13RA2</i><br>(IL13R $\alpha$ 2) | 5'     | TAAACCTTTGCCGCCAGTCT      |
|                                      | 3'     | AGGTCCCAAAGGTATGCTCC      |
| <i>AREG</i><br>(amphiregulin)        | 5'     | GTGTCCCAGAGACCGAGTTG      |
|                                      | 3'     | ATGGTTCACGCTTCCCAGAG      |
| <i>VEGFA</i><br>(VEGF-A)             | 5'     | AGGCCAGCACATAGGAGAGA      |
|                                      | 3'     | TTTCTTGCGCTTTCGTTTTT      |

Fig. S1

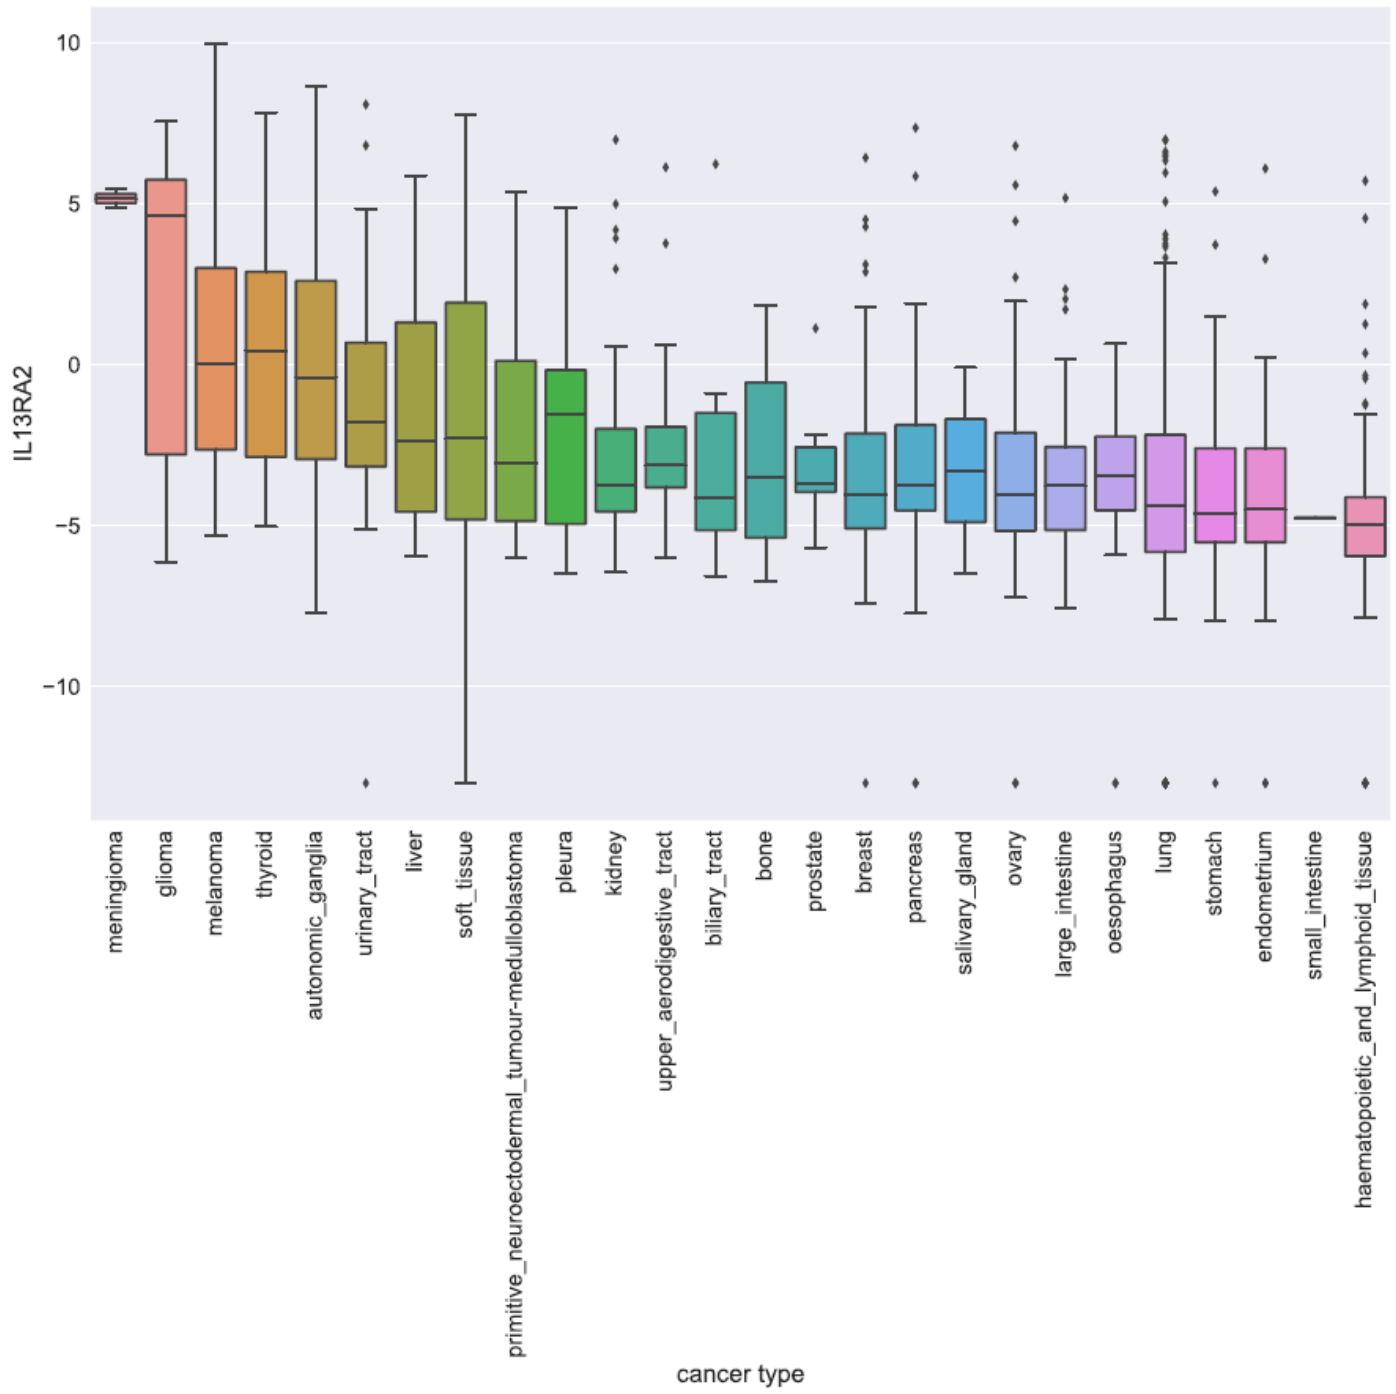

**Fig. S2**

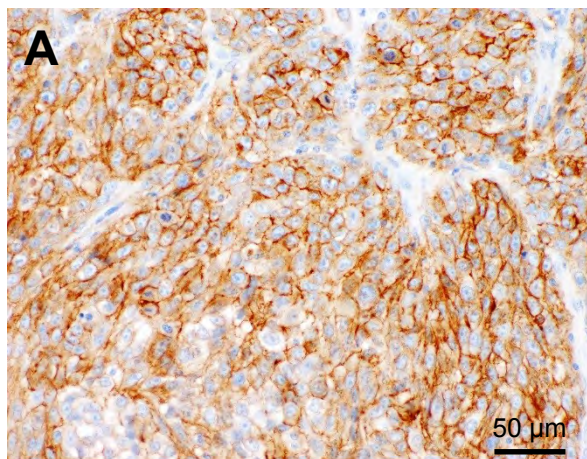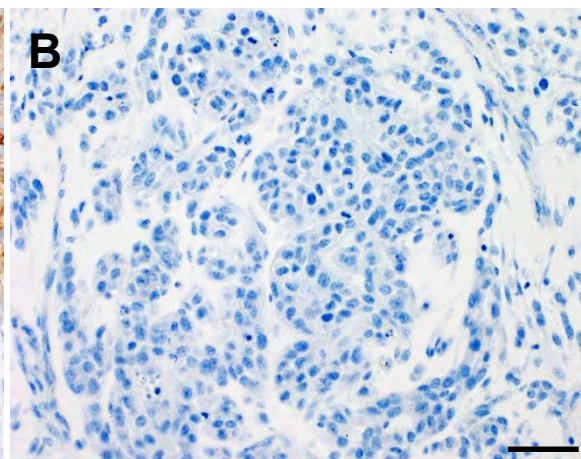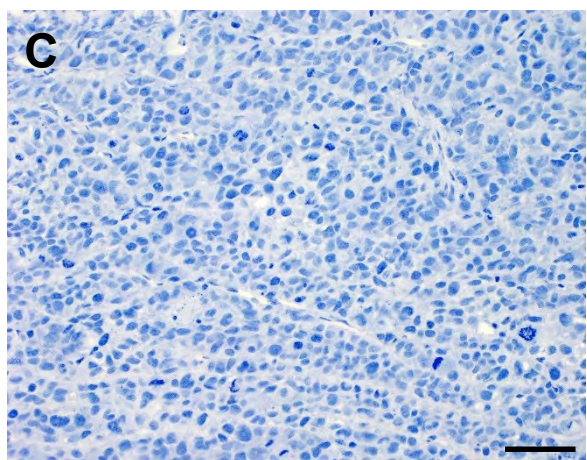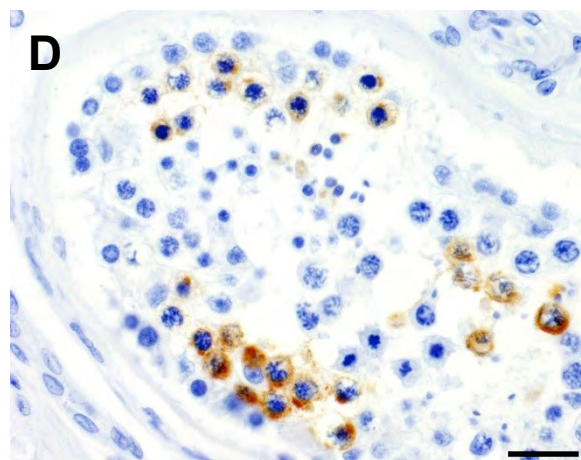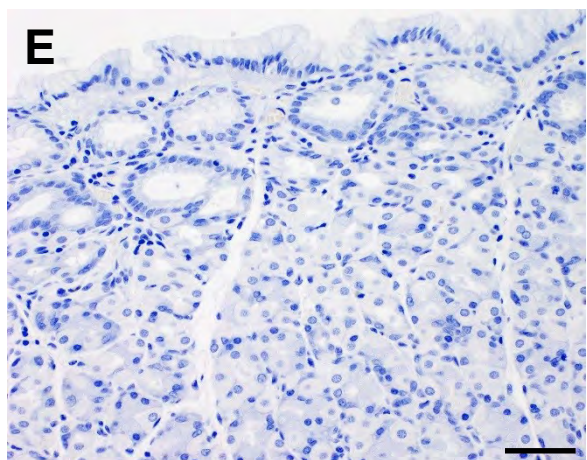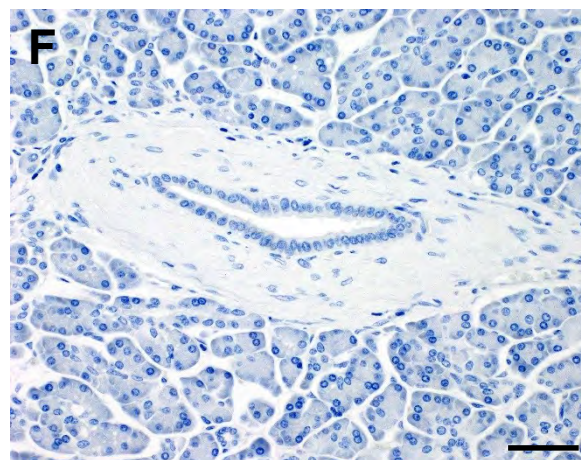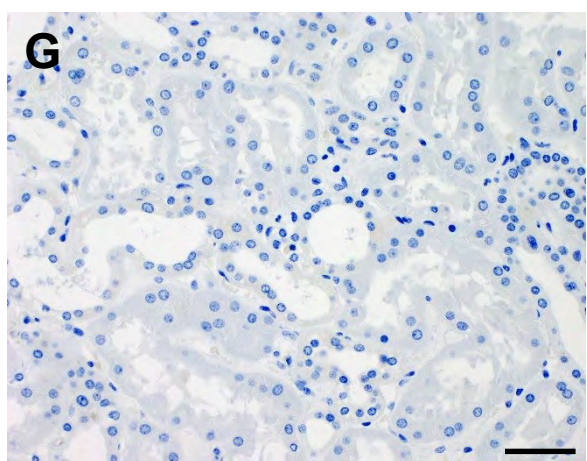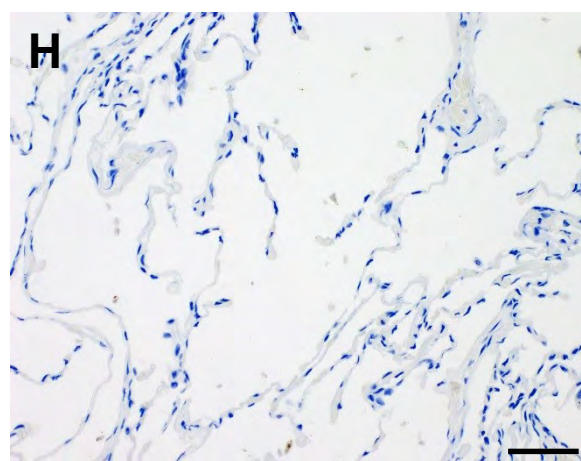

**Fig. S3**

**A**

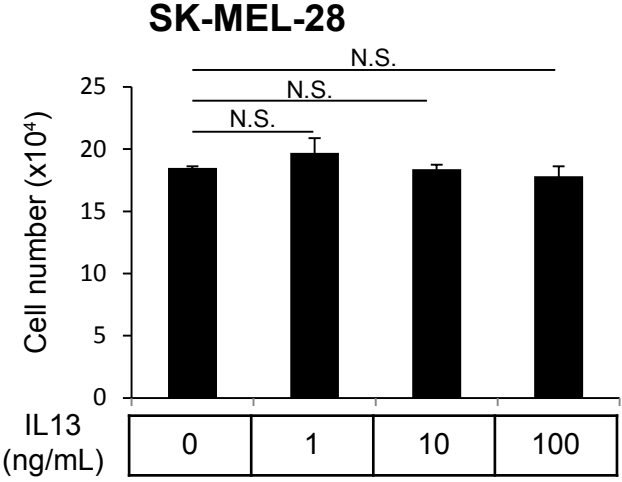

**B**

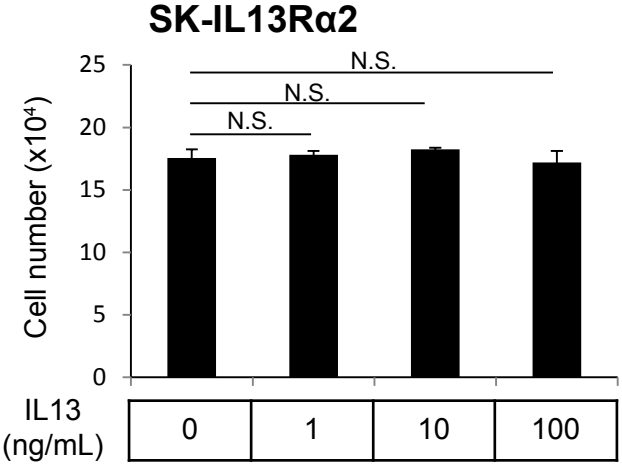

**C**

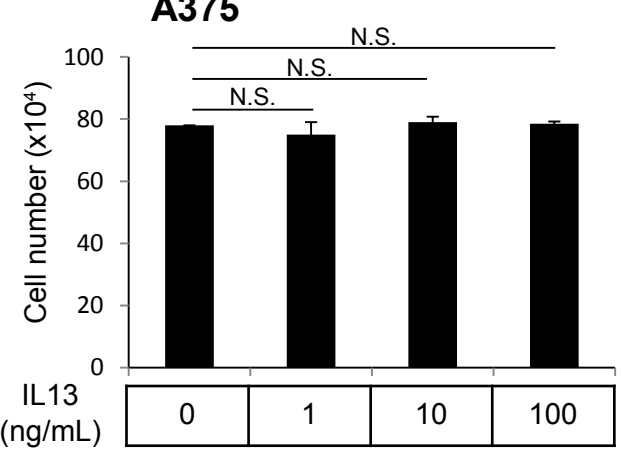



**Fig. S4**

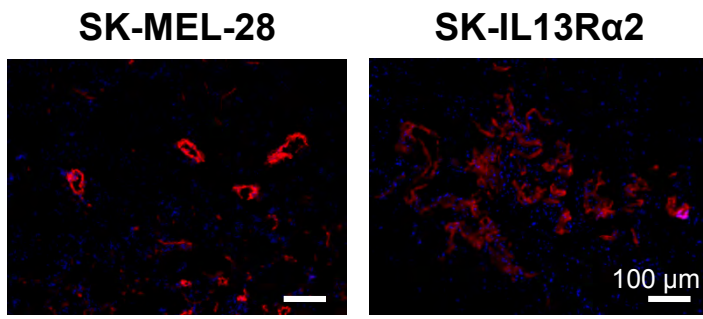

Fig. S5

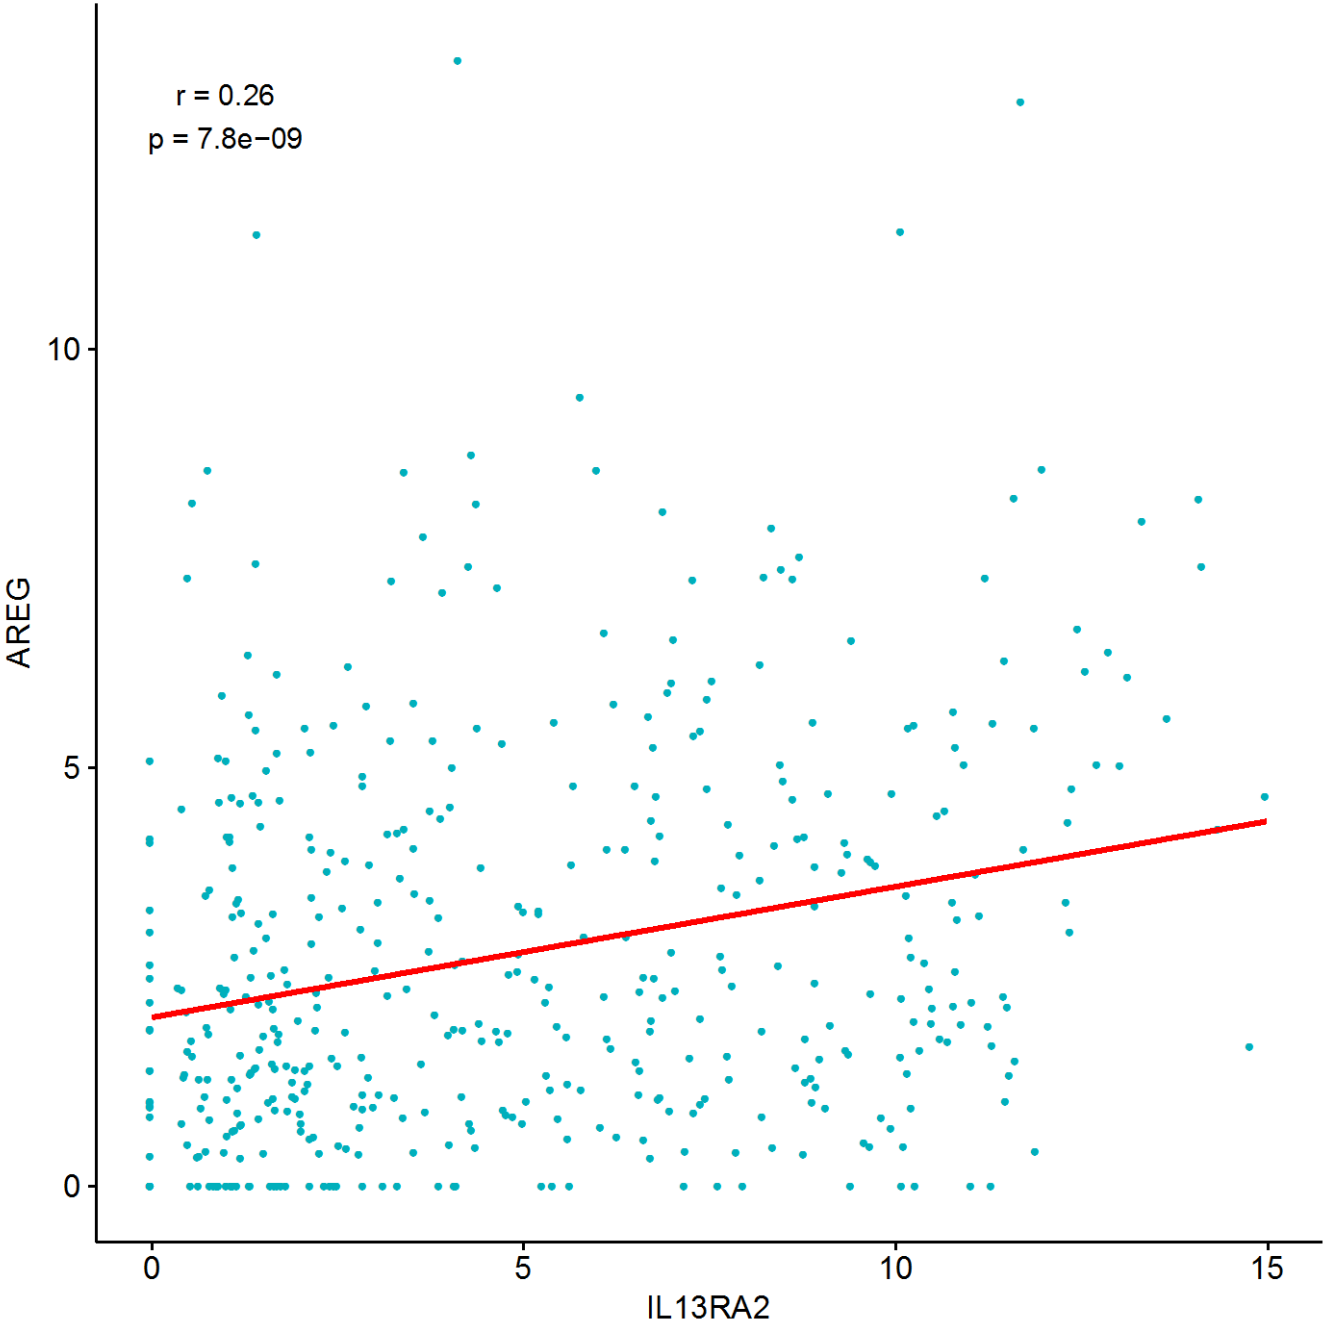

**Fig. S6**

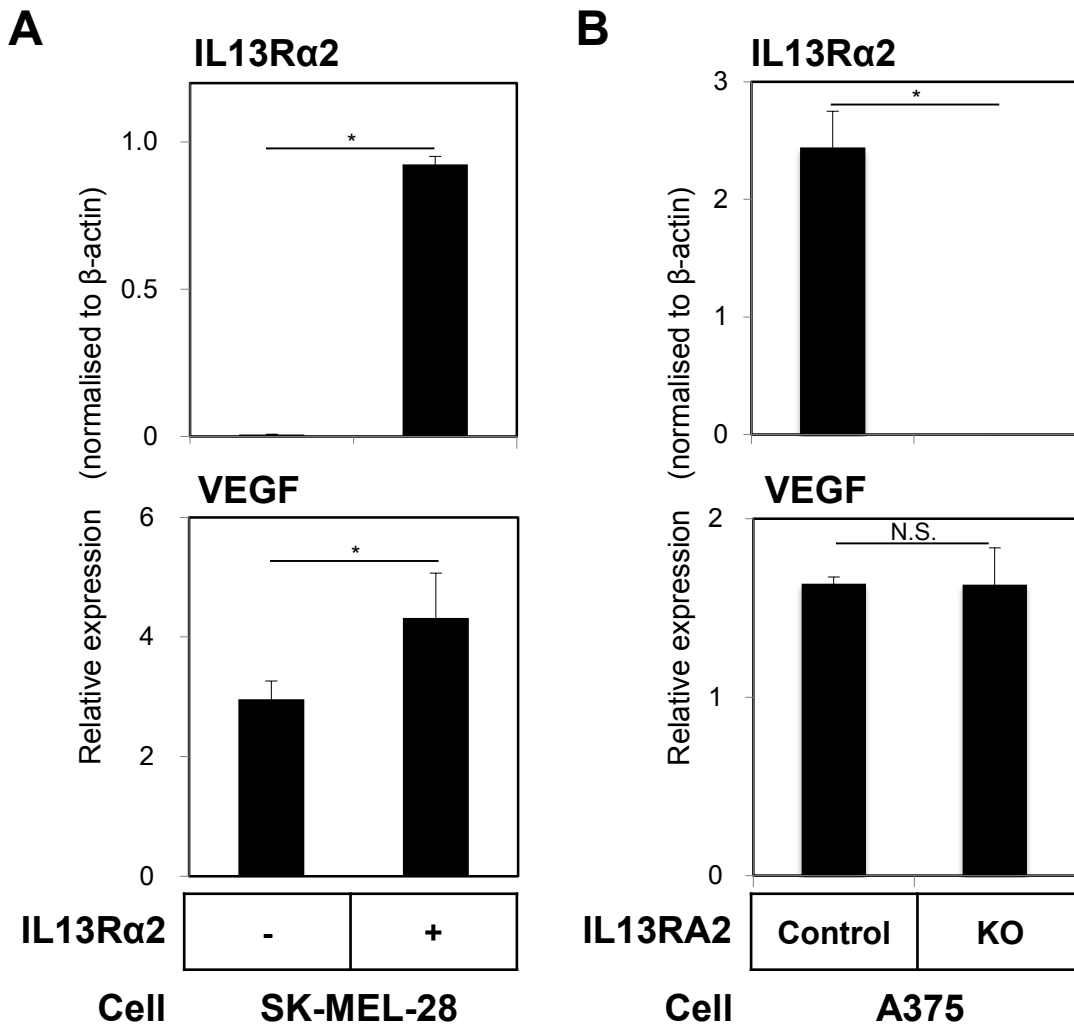

**Fig. S7**

**IL13R $\alpha$ 2**

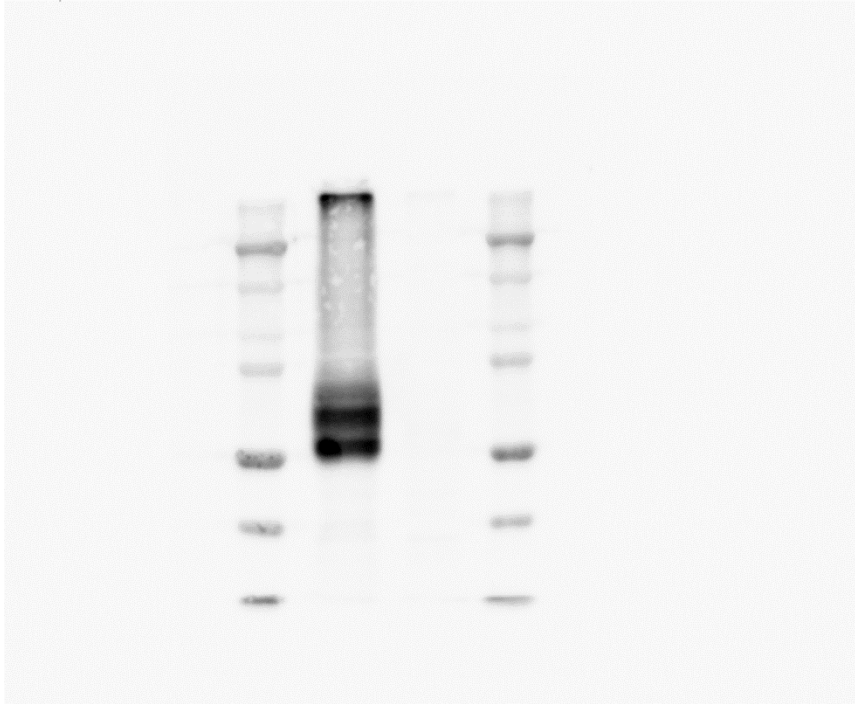

**$\beta$ -actin**

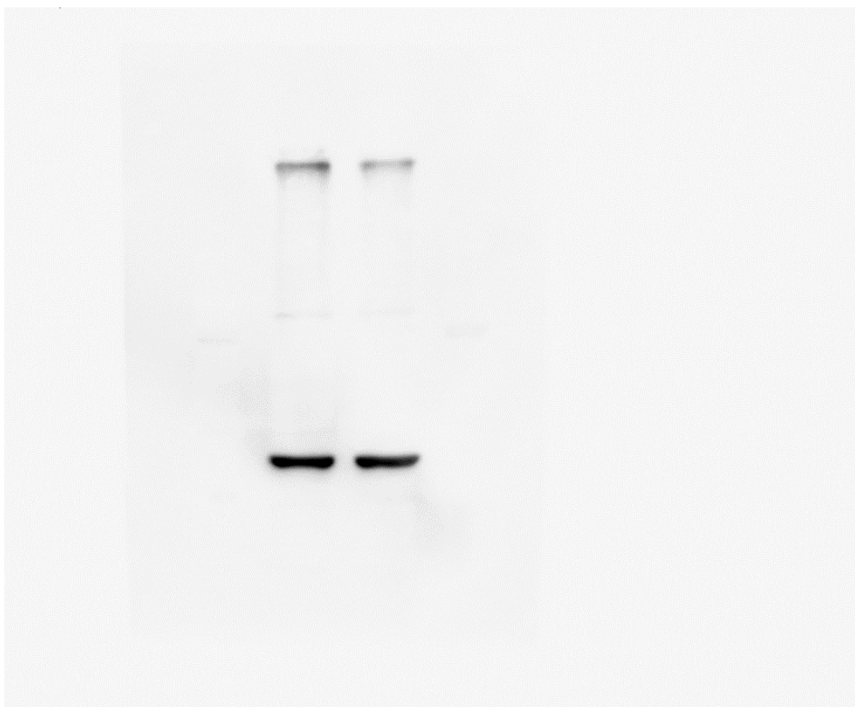

Supplement: 41598_2019_39018_MOESM1_ESM.pdf [file 41598_2019_39018_MOESM1_ESM.pdf]
